# Supplementary material for: Seasonal variability of trace elements in fine particulate matter (PM2.5) in a coastal city of northern Poland – profile analysis and source identification
Source: Royal Society of Chemistry journal article supplement (doi:10.1039/d0em00031k), 2020-01-01

**Fig. S1.** Examples of 48-h backward trajectory frequency at the sampling site in Gdynia during episodes with high Zn concentration in PM<sub>2.5</sub> (grey) and cases corresponding to high V/Ni ratio in PM<sub>2.5</sub> samples (yellow). The coloured legend represents the % of trajectories passing through each grid square to the total number of trajectories. The parameters of the HYSPLIT trajectory frequency model were as follows: trajectory frequency grid resolution – 1.0 °, trajectory starting interval: 6h, trajectory level height: 500 m AGL, the archived meteorological input data: GDAS1, last access: 23 April 2020.

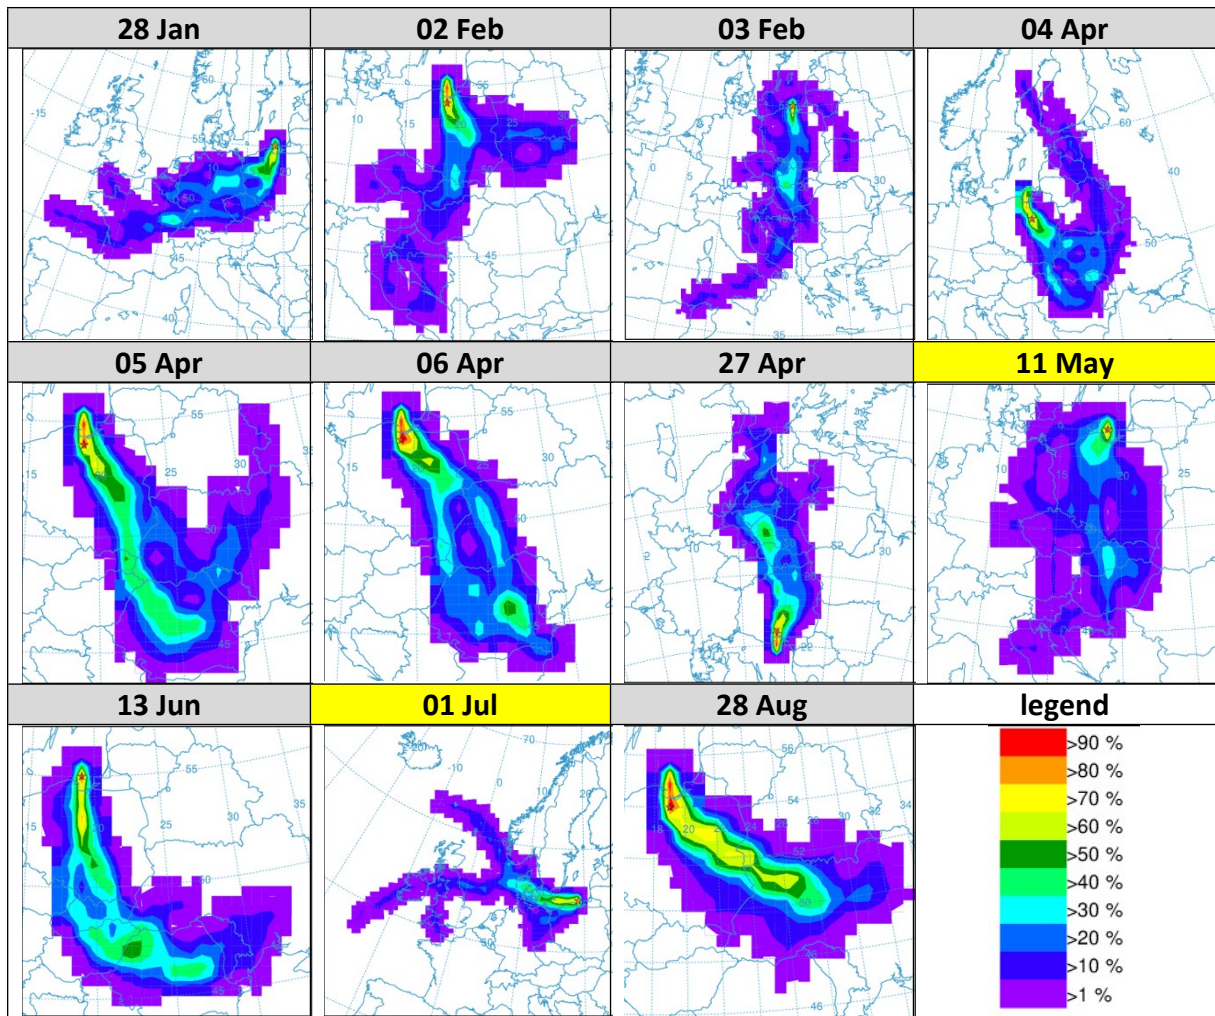

Supplement: d0em00031k1.pdf [file d0em00031k1.pdf]
